# Supplementary material
Source: Springer Nature journal article supplement (https://www.springermedizin.de/resource/supplementary/13049_2011_482_MOESM6_ESM.pdf/9666498)

## School and faculty

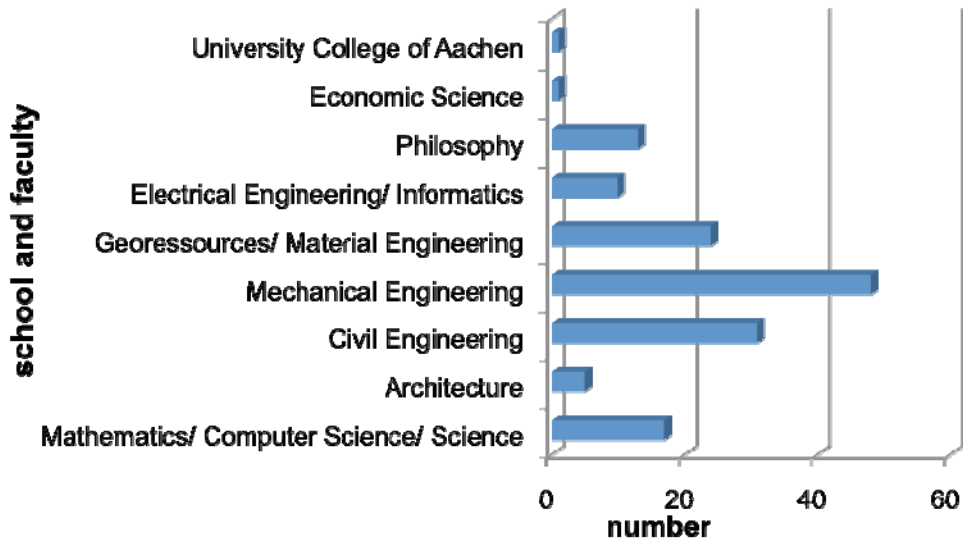

Supplement: MOESM6 [file 9666498]
